# Supplementary material for: Cost-Effectiveness of Esketamine Nasal Spray for Patients With Treatment-Resistant Depression in the United States
Source: Atypon-hosted journal article supplement (doi:10.1176/appi.ps.201900625), 2020-07-07
Supplement: appi.ps.201900625.ds001.pdf [file appi.ps.201900625.ds001.pdf]

**Cost-effectiveness of esketamine nasal spray for patients with treatment-resistant depression in the United States**

*Supplementary appendix*

## Table of Contents

|                                                                                                                                  |    |
|----------------------------------------------------------------------------------------------------------------------------------|----|
| Supplementary Tables .....                                                                                                       | 3  |
| Impact inventory .....                                                                                                           | 3  |
| Esketamine doses and dose frequency in phase III randomized trials .....                                                         | 4  |
| Supplementary Figures .....                                                                                                      | 5  |
| Decision-analytic model structure.....                                                                                           | 5  |
| Relative risk of remission of treatment-resistant depression with esketamine vs. placebo.....                                    | 7  |
| Relative risk of response of treatment-resistant depression with esketamine vs. placebo .....                                    | 8  |
| Relative risk of remission of treatment-resistant depression with esketamine vs. placebo<br>excluding the TRANSFORM-3 trial..... | 9  |
| Relative risk of response of treatment-resistant depression with esketamine vs. placebo<br>excluding the TRANSFORM-3 trial.....  | 10 |
| One-way sensitivity analyses, societal perspective.....                                                                          | 11 |
| One-way sensitivity analyses, healthcare sector perspective .....                                                                | 12 |

## Supplementary Tables

### Impact inventory

| Sector                            | Type of impact                              | Included in this analysis from given perspective? |            |
|-----------------------------------|---------------------------------------------|---------------------------------------------------|------------|
|                                   |                                             | Healthcare sector                                 | Societal   |
| <i>Formal healthcare sector</i>   |                                             |                                                   |            |
| Health                            | <u>Health outcomes</u>                      |                                                   |            |
|                                   | Longevity effects                           | No                                                | No         |
|                                   | Health-related quality of life effects      | <b>Yes</b>                                        | <b>Yes</b> |
|                                   | Other health effects (e.g. adverse effects) | No                                                | No         |
|                                   | <u>Medical costs</u>                        |                                                   |            |
|                                   | Third-party payers                          | <b>Yes</b>                                        | <b>Yes</b> |
|                                   | Out-of-pocket                               | <b>Yes</b>                                        | <b>Yes</b> |
|                                   | Future related medical costs                | <b>Yes</b>                                        | <b>Yes</b> |
|                                   | Future unrelated medical costs              | <b>Yes</b>                                        | <b>Yes</b> |
| <i>Informal healthcare sector</i> |                                             |                                                   |            |
| Health                            | Patient time costs                          | No                                                | <b>Yes</b> |
|                                   | Unpaid caregiver time costs                 | No                                                | No         |
|                                   | Transportation costs                        | No                                                | No         |
| <i>Non-healthcare sector</i>      |                                             |                                                   |            |
| Productivity                      | Lost productivity due to illness            | No                                                | <b>Yes</b> |

## Esketamine doses and dose frequency in phase III randomized trials

|                                                     | <b>Initiation<br/>(month 1)</b> | <b>Remission<br/>(months 2+)</b> | <b>Response<br/>(months 2+)</b> | <b>Non-response, relapse<br/>(months 2+)</b> |
|-----------------------------------------------------|---------------------------------|----------------------------------|---------------------------------|----------------------------------------------|
| <b>Data source</b>                                  | TRANSFORM-2                     | SUSTAIN-1                        | SUSTAIN-1                       | <i>Average of remission<br/>and response</i> |
| <b>Esketamine dose,<br/>percent of patients</b>     |                                 |                                  |                                 |                                              |
| 84 mg                                               | 66.7                            | 55.6                             | 67.7                            | 61.7                                         |
| 56 mg                                               | 33.3                            | 44.4                             | 32.3                            | 38.3                                         |
| <b>Treatment frequency,<br/>percent of patients</b> |                                 |                                  |                                 |                                              |
| <i>Twice weekly</i>                                 | 100.0                           | –                                | –                               | –                                            |
| <i>Weekly</i>                                       | –                               | 23.3                             | 54.8                            | 39.1                                         |
| <i>Every other week</i>                             | –                               | 68.9                             | 33.9                            | 51.4                                         |
| <i>Weekly or every other week</i>                   | –                               | 7.8                              | 11.3                            | 9.5                                          |
| <b>Average number of 28 mg<br/>doses per month</b>  | 23.2                            | 7.1                              | 9.3                             | 8.2                                          |

## Supplementary Figures

### Decision-analytic model structure

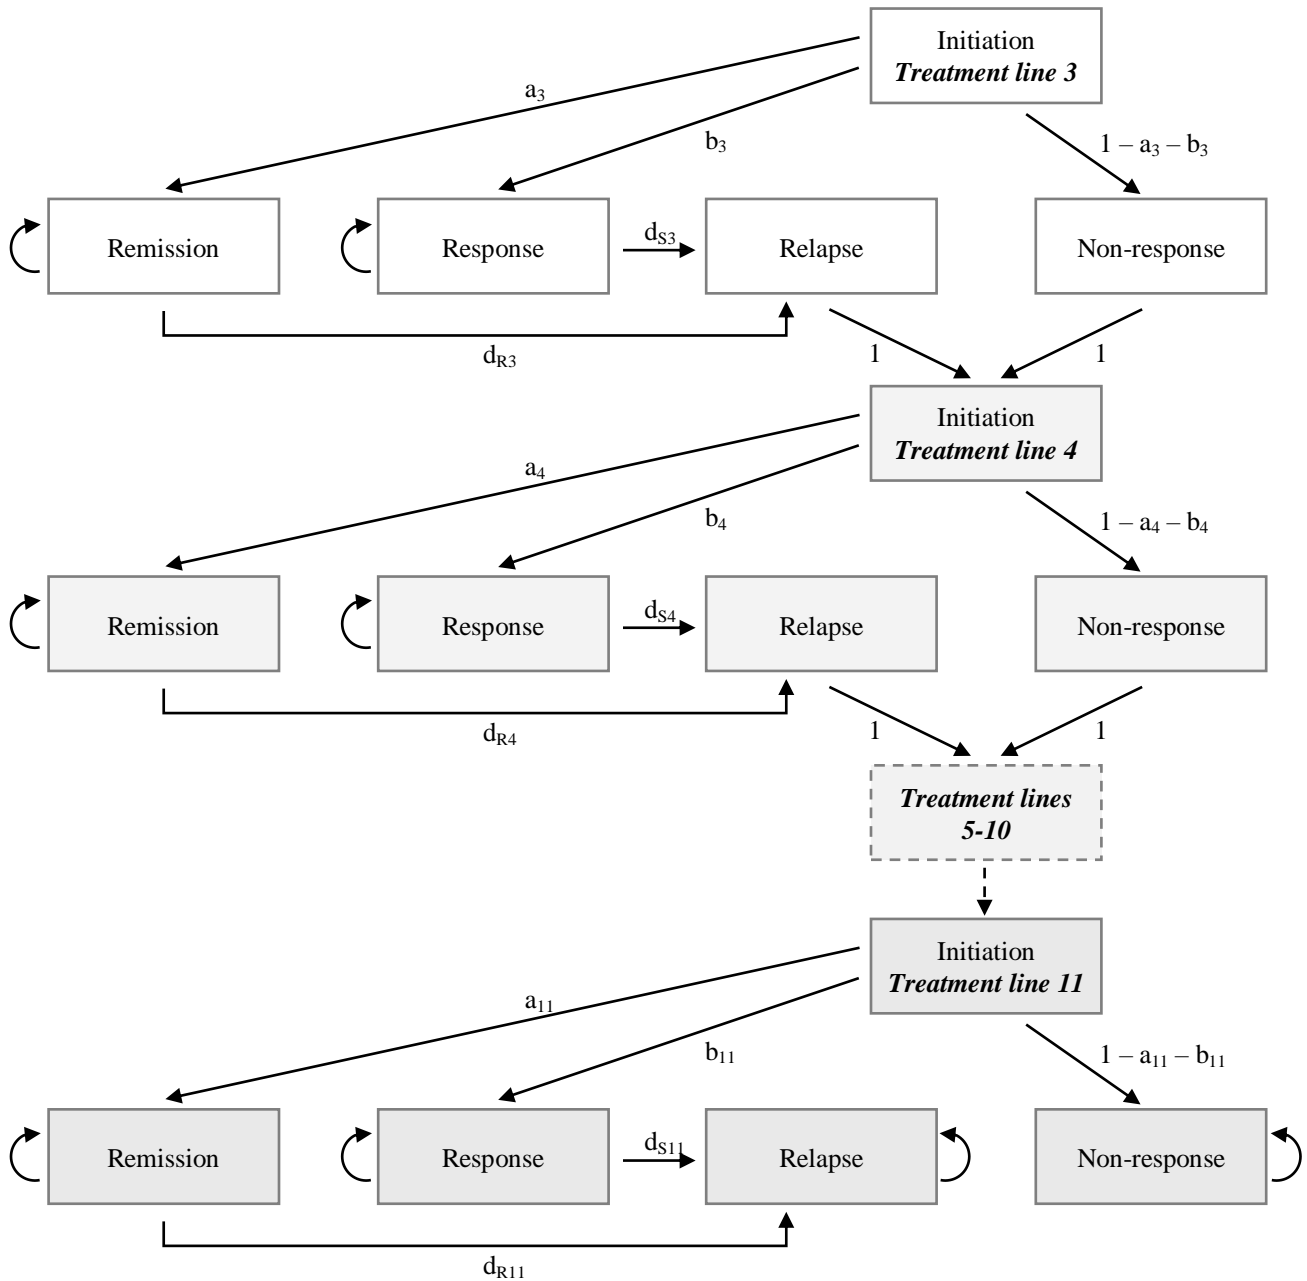

Rectangles represent simulated depression health states; each group of five health states of the same color indicates one treatment line. Lines 5-10 have an identical structure to the preceding lines but are collapsed into a single rectangle in the Figure for the sake of simplicity. Arrows represent transition probabilities between health states. For clarity, monthly all-cause mortality

probabilities (which apply to all health states) are omitted from the Figure. Transition probabilities indicated by letters include: **a**, initial probability of remission; **b**, initial probability of response without meeting remission criteria; **d<sub>R</sub>**, monthly probability of relapse after initial remission; **d<sub>S</sub>**, monthly probability of relapse after initial response.

## Relative risk of remission of treatment-resistant depression with esketamine vs. placebo

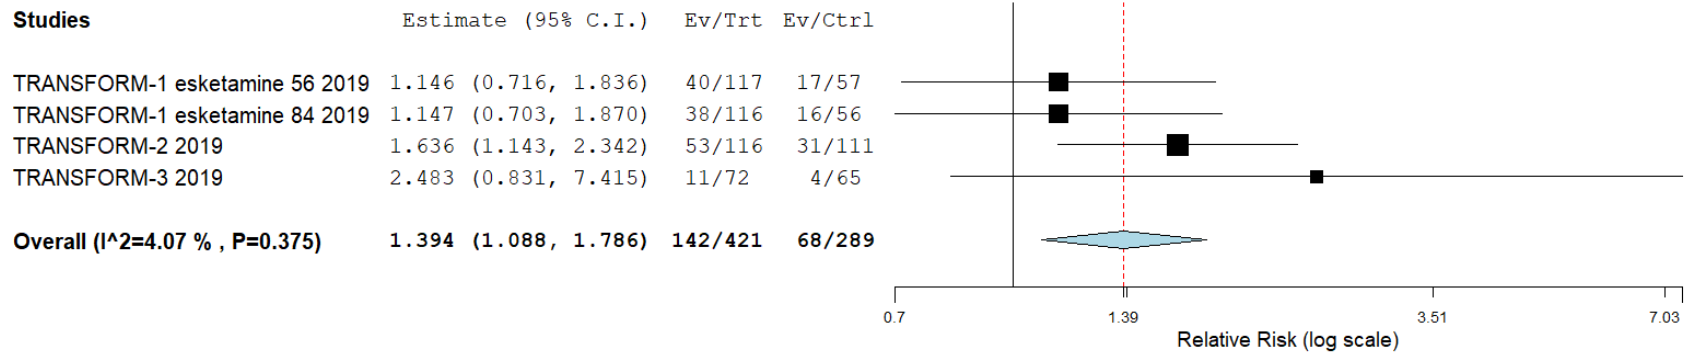

Forest plot showing the relative risk of remission of depressive symptoms among patients with treatment-resistant depression after 4 weeks of treatment with esketamine nasal spray vs. placebo. Data are drawn from 3 phase III clinical trials of esketamine; in the TRANSFORM-1 trial, patients were randomized to placebo, a 56 mg dose of esketamine, or an 84 mg dose of esketamine.

## Relative risk of response of treatment-resistant depression with esketamine vs. placebo

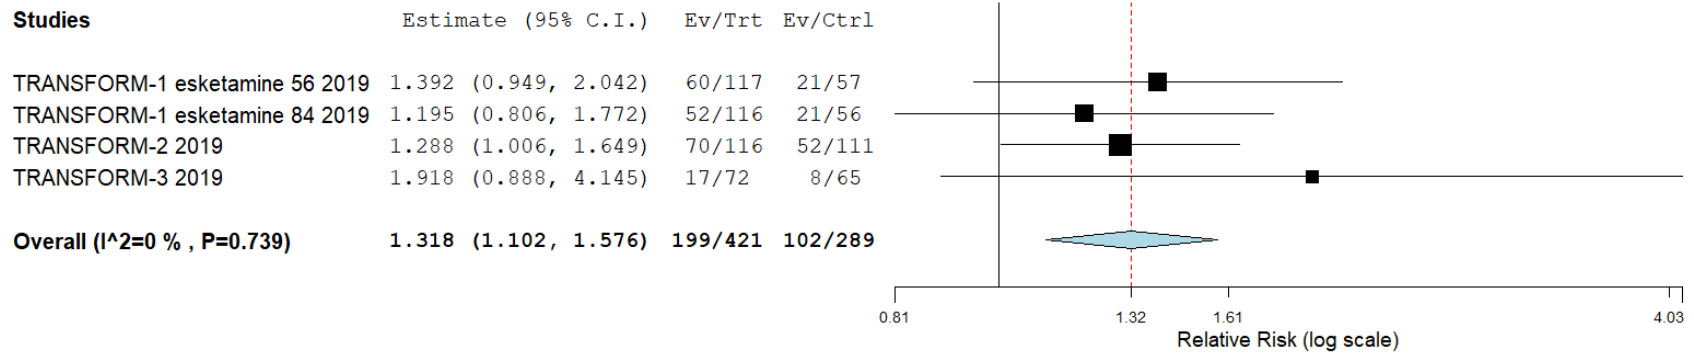

Forest plot showing the relative risk of response of depressive symptoms among patients with treatment-resistant depression after 4 weeks of treatment with esketamine nasal spray vs. placebo. Data are drawn from 3 phase III clinical trials of esketamine; in the TRANSFORM-1 trial, patients were randomized to placebo, a 56 mg dose of esketamine, or an 84 mg dose of esketamine.



## Relative risk of remission of treatment-resistant depression with esketamine vs. placebo excluding the TRANSFORM-3 trial

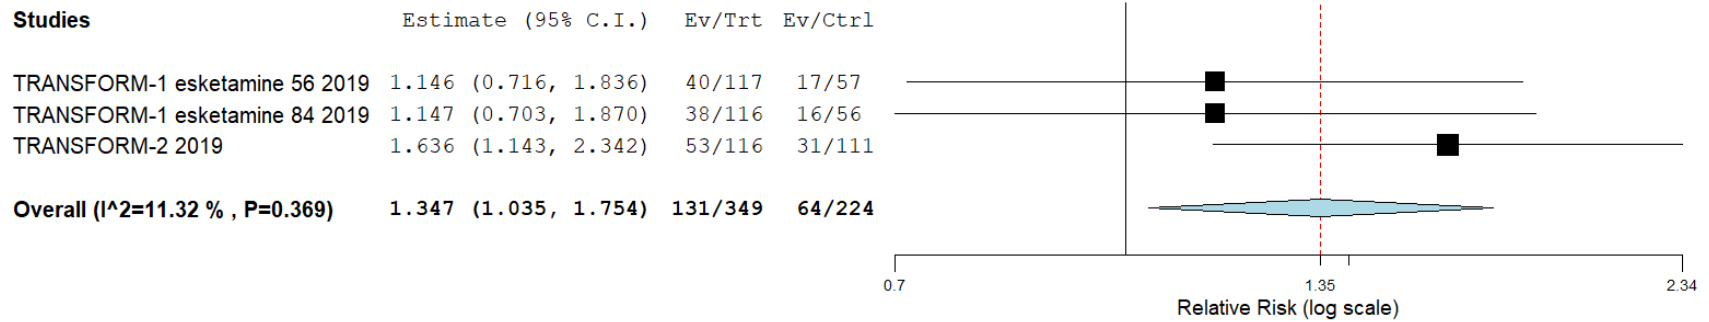

Forest plot showing the relative risk of remission of depressive symptoms among patients with treatment-resistant depression after 4 weeks of treatment with esketamine nasal spray vs. placebo. Data are drawn from 2 phase III clinical trials of esketamine; the TRANSFORM-3 trial, which enrolled only patients aged  $\geq 65$ , is excluded from this analysis.

Relative risk of response of treatment-resistant depression with esketamine vs. placebo excluding the TRANSFORM-3 trial

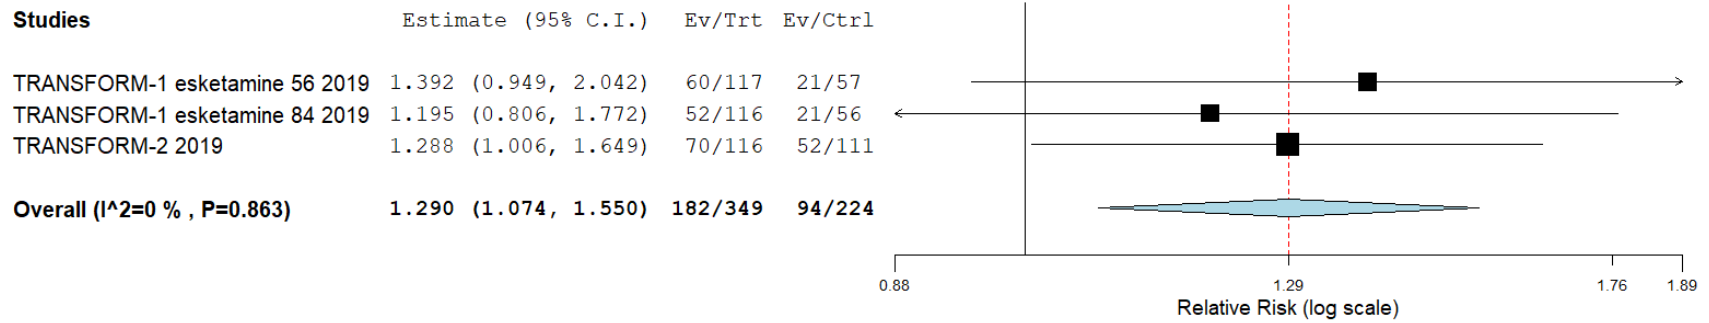

Forest plot showing the relative risk of response of depressive symptoms among patients with treatment-resistant depression after 4 weeks of treatment with esketamine nasal spray vs. placebo. Data are drawn from 2 phase III clinical trials of esketamine; the TRANSFORM-3 trial, which enrolled only patients aged  $\geq 65$ , is excluded from this analysis.

## One-way sensitivity analyses, societal perspective

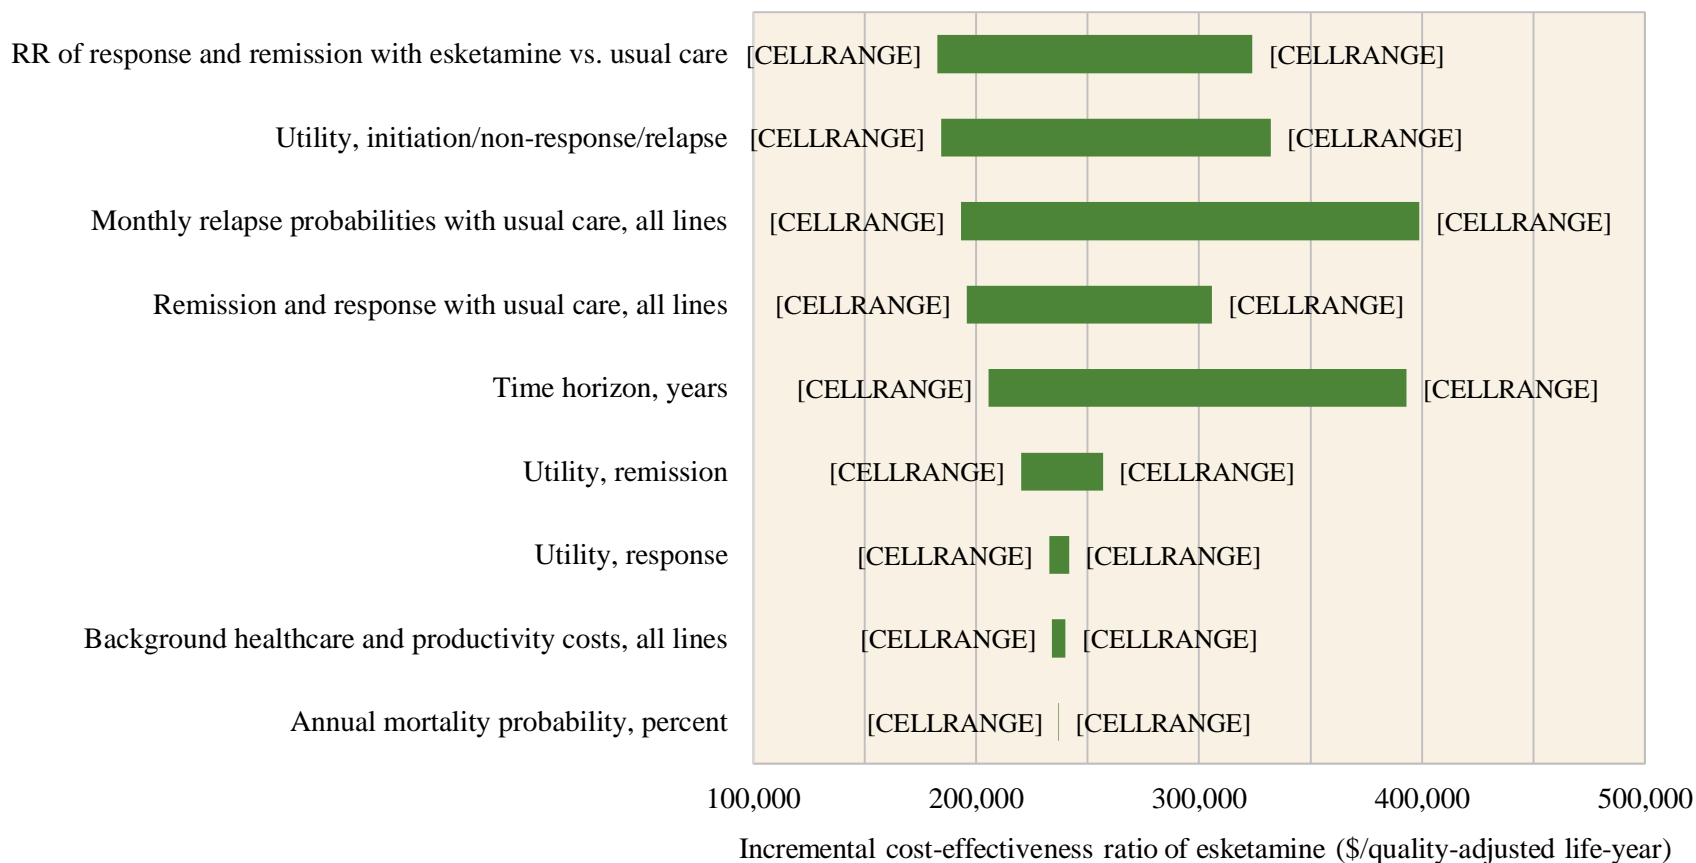

Horizontal bars indicate the range of societal incremental cost-effectiveness ratios (ICERs) for esketamine produced by varying each model parameter shown on the vertical axis. Parameter values producing the lower value and higher value of the ICER are shown on either side of each horizontal bar.

RR, relative risk; 95% CI UL, upper limit of the 95% confidence interval; 95% CI LL, lower limit of the 95% confidence interval

## One-way sensitivity analyses, healthcare sector perspective

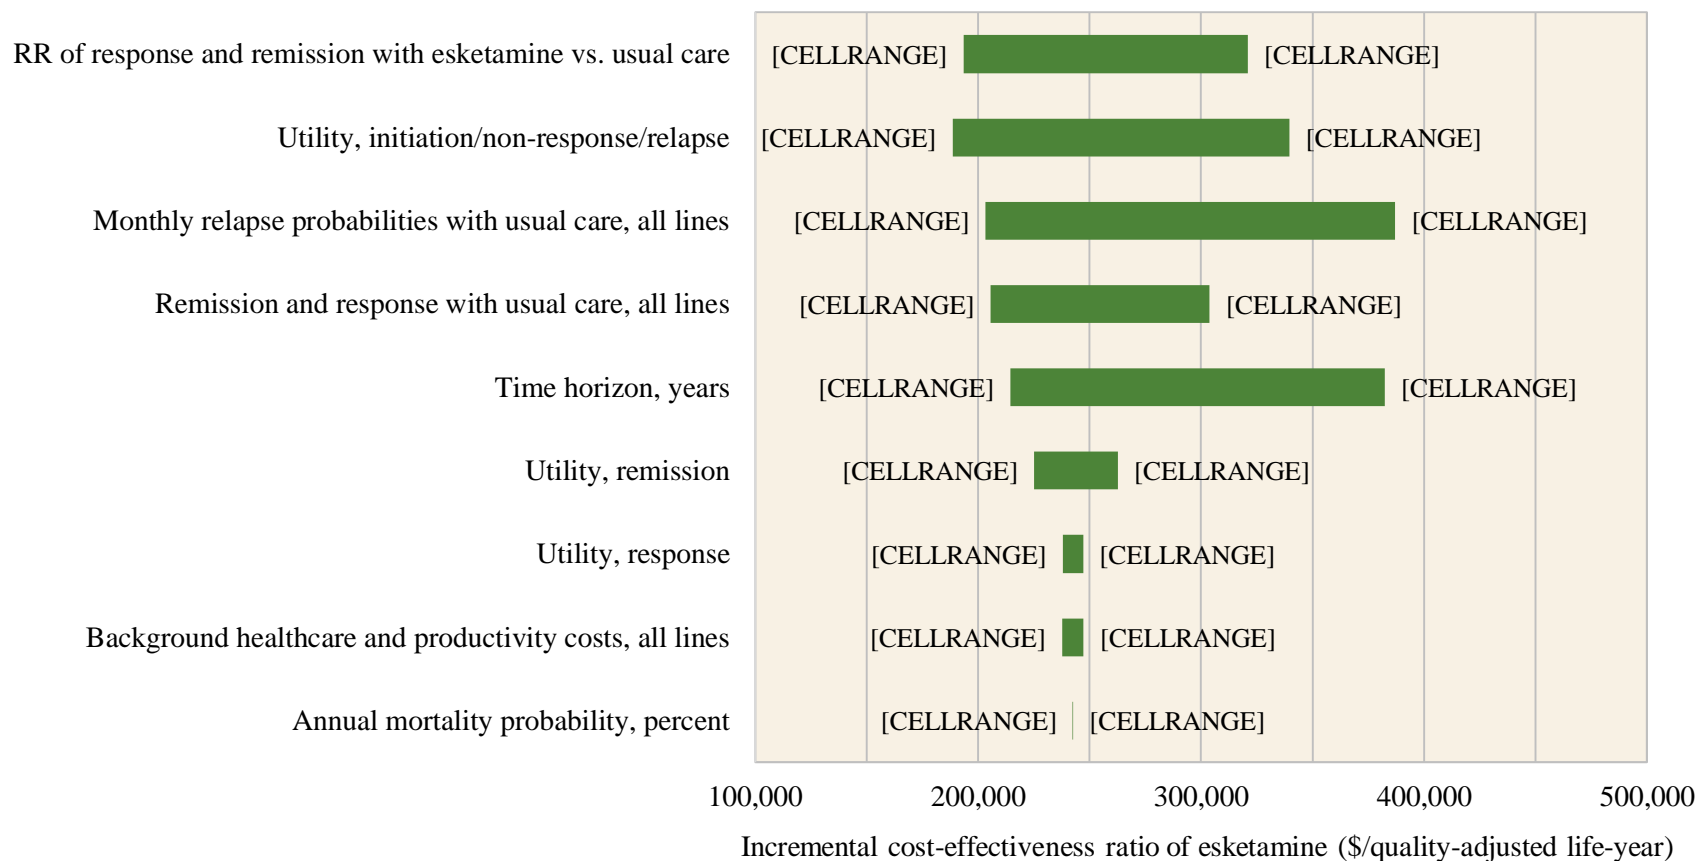

Horizontal bars indicate the range of healthcare sector incremental cost-effectiveness ratios (ICERs) for esketamine produced by varying each model parameter shown on the vertical axis. Parameter values producing the lower value and higher value of the ICER are shown on either side of each horizontal bar.

RR, relative risk; 95% CI UL, upper limit of the 95% confidence interval; 95% CI LL, lower limit of the 95% confidence interval
